# Supplementary material for: Effectiveness of management strategies for uninvestigated dyspepsia: systematic review and network meta-analysis
Source: PubMed Central journal article supplement — BMJ. 2019 Dec 11;367:l6483. doi: 10.1136/bmj.l6483 (PMC7190054; doi:10.1136/bmj.l6483), 2019-12-11
Supplement: eusl050524.ww.pdf [file eusl050524.ww.pdf]

## Search Strategy

Dyspepsia, heartburn, gastroesophageal reflux, esophagitis, dyspeps\$, peptic ulcer, peptic  
adj5 ulcer

*Helicobacter pylori*, breath tests, gastroscopy, duodenoscopy, endoscopy, serology,  
*Helicobacter* adj5 *pylori*, near adj5 patient\$ adj5 test\$, anti-ulcer agents, histamine H2  
antagonists, cimetidine, famotidine, ranitidine, nizatidine, omeprazole, lansoprazole,  
rabeprazole, pantoprazole, esomeprazole, amoxicillin, metronidazole, clarithromycin,  
bismuth, levofloxacin, anti?ulcer, histamine adj5 H2 adj5 antagonist\$,  
primary health care, family practice, physicians, family, primary adj5 health adj5 care, family  
adj5 practi\$, physician\$ adj5 family, family adj5 medic\$, physician\$ adj5 family, family adj5  
medic\$, general adj5 practi\$.

**Supplementary Table 1. Risk of Bias of Randomised Controlled Trials of Management Strategies for Uninvestigated Dyspepsia.**

| <b>Study</b>                                                               | <b>Method of Generation of Randomisation Schedule</b> | <b>Method of Concealment of Treatment Allocation</b> | <b>Blinding</b> | <b>Evidence of Incomplete Outcomes Data</b> | <b>Evidence of Selective Reporting of Outcomes</b> |
|----------------------------------------------------------------------------|-------------------------------------------------------|------------------------------------------------------|-----------------|---------------------------------------------|----------------------------------------------------|
| <b>Bytzer 1994</b> <sup>13</sup>                                           | Unclear                                               | Unclear                                              | High            | High                                        | Low                                                |
| <b>Heaney 1999</b> <sup>45</sup>                                           | Unclear                                               | Unclear                                              | High            | High                                        | Low                                                |
| <b>Delaney 2000</b> <sup>15</sup>                                          | Low                                                   | Low                                                  | High            | High                                        | Low                                                |
| <b>Lassen 2000</b> <sup>46</sup>                                           | Low                                                   | Low                                                  | High            | High                                        | Low                                                |
| <b>Delaney 2001</b> <sup>16</sup>                                          | Low                                                   | Low                                                  | High            | High                                        | Low                                                |
| <b>Lewin van den Broek 2001</b> <sup>51</sup>                              | Low                                                   | Unclear                                              | High            | High                                        | Low                                                |
| <b>McColl 2002</b> <sup>17</sup>                                           | Low                                                   | Low                                                  | High            | High                                        | Low                                                |
| <b>Arents 2003</b> <sup>47</sup>                                           | Unclear                                               | Low                                                  | High            | High                                        | Low                                                |
| <b>Manes 2003</b> <sup>49</sup>                                            | Low                                                   | Unclear                                              | High            | Low                                         | Low                                                |
| <b>Jarbol 2006</b> <sup>42</sup>                                           | Low                                                   | Low                                                  | High            | High                                        | Low                                                |
| <b>Kjeldsen 2007</b> <sup>50</sup>                                         | Unclear                                               | Unclear                                              | High            | High                                        | Low                                                |
| <b>Delaney 2008</b> <sup>14</sup>                                          | Low                                                   | Low                                                  | High            | High                                        | Low                                                |
| <b>Mahadeva 2008</b> <sup>48</sup>                                         | Low                                                   | Unclear                                              | High            | Low                                         | Low                                                |
| <b>Duggan 2009</b> <sup>18</sup>                                           | Low                                                   | Low                                                  | High            | Low                                         | Low                                                |
| <b>Myres (unpublished, but data available in Ford 2005</b> <sup>19</sup> ) | Unclear                                               | Unclear                                              | High            | High                                        | Low                                                |

**Supplementary Table 2. *Netsplit* Analysis of Inconsistency for Likelihood of Remaining Symptomatic According to Intention-to-treat Analysis at the Last Point of Follow-up.**

| Comparison                                              | k | Prop. | NMA    | Direct | Indirect | RoR    | z     | p-value |
|---------------------------------------------------------|---|-------|--------|--------|----------|--------|-------|---------|
| "Test and scope" vs. "Test and treat"                   | 1 | 0.47  | 1.0322 | 0.9789 | 1.0816   | 0.9050 | -0.63 | 0.5282  |
| "Test and scope" vs. Empirical acid suppression         | 1 | 0.46  | 0.9629 | 0.9921 | 0.9392   | 1.0563 | 0.34  | 0.7306  |
| "Test and scope" vs. Prompt endoscopy                   | 1 | 0.41  | 1.0205 | 1.0615 | 0.9923   | 1.0697 | 0.43  | 0.6653  |
| "Test and scope" vs. Symptom-based management           | 1 | 0.61  | 0.9201 | 0.9169 | 0.9250   | 0.9913 | -0.06 | 0.9544  |
| "Test and treat" vs. Empirical acid suppression         | 4 | 0.68  | 0.9328 | 0.9134 | 0.9758   | 0.9361 | -0.71 | 0.4748  |
| "Test and treat" vs. Prompt endoscopy                   | 7 | 0.79  | 0.9886 | 1.0107 | 0.9110   | 1.1095 | 1.11  | 0.2649  |
| "Test and treat" vs. Symptom-based management           | 0 | 0     | 0.8914 | 0.8914 | NA       | NA     | NA    | NA      |
| Empirical acid suppression vs. Prompt endoscopy         | 4 | 0.62  | 1.0598 | 1.0370 | 1.0976   | 0.9448 | -0.63 | 0.5289  |
| Empirical acid suppression vs. Symptom-based management | 1 | 0.39  | 0.9556 | 0.9314 | 0.9712   | 0.9590 | -0.30 | 0.7670  |
| Prompt endoscopy vs. Symptom-based management           | 2 | 0.69  | 0.9016 | 0.9047 | 0.8950   | 1.0108 | 0.08  | 0.9379  |

**Legend**

Comparison: Treatment comparison  
k: Number of studies providing direct evidence  
Prop.: Direct evidence proportion  
NMA: Estimated treatment effect (RR) in network meta-analysis  
Direct: Estimated treatment effect (RR) derived from direct evidence  
Indirect: Estimated treatment effect (RR) derived from indirect evidence  
RoR: Ratio of Ratios (direct versus indirect)  
z: z-value of test for disagreement (direct versus indirect)  
p-value: p-value of test for disagreement (direct versus indirect)

**Supplementary Table 3. *Netsplit* Analysis of Inconsistency for Likelihood of Remaining Symptomatic According to Per Protocol**

**Analysis at the Last Point of Follow-up.**

| Comparison                                              | k | Prop. | NMA    | Direct | Indirect | RoR    | z     | p-value |
|---------------------------------------------------------|---|-------|--------|--------|----------|--------|-------|---------|
| "Test and scope" vs. "Test and treat"                   | 1 | 0.43  | 1.0222 | 0.9638 | 1.0687   | 0.9018 | -0.49 | 0.6223  |
| "Test and scope" vs. Empirical acid suppression         | 1 | 0.44  | 0.9326 | 0.9164 | 0.9453   | 0.9694 | -0.15 | 0.8818  |
| "Test and scope" vs. Prompt endoscopy                   | 1 | 0.40  | 1.0058 | 1.0312 | 0.9894   | 1.0423 | 0.20  | 0.8418  |
| "Test and scope" vs. Symptom-based management           | 1 | 0.59  | 0.8921 | 0.9080 | 0.8694   | 1.0444 | 0.22  | 0.8290  |
| "Test and treat" vs. Empirical acid suppression         | 4 | 0.68  | 0.9123 | 0.8890 | 0.9626   | 0.9236 | -0.75 | 0.4512  |
| "Test and treat" vs. Prompt endoscopy                   | 7 | 0.79  | 0.9839 | 1.0042 | 0.9121   | 1.1010 | 0.90  | 0.3670  |
| "Test and treat" vs. Symptom-based management           | 0 | 0     | 0.8727 | NA     | 0.8727   | NA     | NA    | NA      |
| Empirical acid suppression vs. Prompt endoscopy         | 4 | 0.60  | 1.0785 | 1.0538 | 1.1160   | 0.9443 | -0.55 | 0.5793  |
| Empirical acid suppression vs. Symptom-based management | 1 | 0.44  | 0.9566 | 0.9242 | 0.9831   | 0.9401 | -0.37 | 0.7097  |
| Prompt endoscopy vs. Symptom-based management           | 2 | 0.71  | 0.8870 | 0.8827 | 0.8973   | 0.9838 | -0.10 | 0.9240  |

**Legend**

Comparison: Treatment comparison  
k: Number of studies providing direct evidence  
Prop.: Direct evidence proportion  
NMA: Estimated treatment effect (RR) in network meta-analysis  
Direct: Estimated treatment effect (RR) derived from direct evidence  
Indirect: Estimated treatment effect (RR) derived from indirect evidence  
RoR: Ratio of Ratios (direct versus indirect)  
z: z-value of test for disagreement (direct versus indirect)  
p-value: p-value of test for disagreement (direct versus indirect)

**Supplementary Table 4. Summary Treatment Effects from the Network Meta-analysis for Likelihood of Remaining Symptomatic According to Per Protocol Analysis at the Last Point of Follow-up.**

|                         |                         |                         |                                   |                                 |
|-------------------------|-------------------------|-------------------------|-----------------------------------|---------------------------------|
| <b>“Test and treat”</b> | 1.00 (0.91; 1.11)       | 1.04 (0.76; 1.42)       | 0.89 (0.79; 1.00)                 | N/A                             |
| 0.98 (0.90; 1.07)       | <b>Prompt endoscopy</b> | 0.97 (0.71; 1.33)       | 0.95 (0.83; 1.08)                 | 0.88 (0.74; 1.06)               |
| 0.98 (0.80; 1.20)       | 0.99 (0.81; 1.21)       | <b>“Test and scope”</b> | 0.92 (0.67; 1.25)                 | 0.91 (0.71; 1.17)               |
| 0.91 (0.83; 1.01)       | 0.93 (0.84; 1.02)       | 0.93 (0.76; 1.14)       | <b>Empirical acid suppression</b> | 0.92 (0.72; 1.18)               |
| 0.87 (0.74; 1.03)       | 0.89 (0.76; 1.03)       | 0.89 (0.73; 1.08)       | 0.96 (0.81; 1.12)                 | <b>Symptom-based management</b> |

Relative risk with 95% confidence intervals in parentheses. Comparisons, column versus row, should be read from left to right, and are ordered relative to their overall effectiveness. The treatment in the top left position is ranked as best after the network meta-analysis of direct and indirect effects. Direct comparisons are provided above the strategy labels, and indirect comparisons are below.

N/A; not applicable, no RCTs making direct comparisons.

**Supplementary Table 5. *Netsplit* Analysis of Inconsistency for Likelihood of Receiving Endoscopy.**

| Comparison                                              | k | Prop. | NMA    | Direct | Indirect | RoR    | z     | p-value |
|---------------------------------------------------------|---|-------|--------|--------|----------|--------|-------|---------|
| "Test and scope" vs. "Test and treat"                   | 1 | 0.54  | 2.3660 | 1.8884 | 3.0802   | 0.6131 | -0.79 | 0.4318  |
| "Test and scope" vs. Empirical acid suppression         | 1 | 0.59  | 1.4035 | 1.1884 | 1.7825   | 0.6667 | -0.63 | 0.5309  |
| "Test and scope" vs. Prompt endoscopy                   | 1 | 0.55  | 0.5482 | 0.5081 | 0.6015   | 0.8447 | -0.28 | 0.7795  |
| "Test and scope" vs. Symptom-based management           | 1 | 0.62  | 1.4130 | 1.7917 | 0.9610   | 1.8645 | 0.91  | 0.3612  |
| "Test and treat" vs. Empirical acid suppression         | 4 | 0.71  | 0.5932 | 0.7199 | 0.3699   | 1.9463 | 1.69  | 0.0918  |
| "Test and treat" vs. Prompt endoscopy                   | 7 | 0.82  | 0.2317 | 0.2053 | 0.4056   | 0.5063 | -1.71 | 0.0880  |
| "Test and treat" vs. Symptom-based management           | 0 | 0     | 0.5972 | NA     | 0.5972   | NA     | NA    | NA      |
| Empirical acid suppression vs. Prompt endoscopy         | 3 | 0.62  | 0.3906 | 0.4830 | 0.2758   | 1.7516 | 1.47  | 0.1405  |
| Empirical acid suppression vs. Symptom-based management | 0 | 0     | 1.0067 | NA     | 1.0067   | NA     | NA    | NA      |
| Prompt endoscopy vs. Symptom-based management           | 1 | 0.64  | 2.5774 | 2.0634 | 3.8472   | 0.5363 | -0.91 | 0.3612  |

**Legend**

Comparison: Treatment comparison  
k: Number of studies providing direct evidence  
Prop.: Direct evidence proportion  
NMA: Estimated treatment effect (RR) in network meta-analysis  
Direct: Estimated treatment effect (RR) derived from direct evidence  
Indirect: Estimated treatment effect (RR) derived from indirect evidence  
RoR: Ratio of Ratios (direct versus indirect)  
z: z-value of test for disagreement (direct versus indirect)  
p-value: p-value of test for disagreement (direct versus indirect)

**Supplementary Table 6. Summary Treatment Effects from the Network Meta-analysis for Participant Dissatisfaction with Management.**

|                         |                         |                         |                                   |
|-------------------------|-------------------------|-------------------------|-----------------------------------|
| <b>Prompt endoscopy</b> | 0.86 (0.42; 1.79)       | 0.75 (0.50; 1.11)       | 0.54 (0.31; 0.92)                 |
| 0.70 (0.37;1.32)        | <b>“Test and scope”</b> | 0.93 (0.45; 1.92)       | 1.06 (0.51; 2.20)                 |
| 0.67 (0.46; 0.98)       | 0.97 (0.51; 1.83)       | <b>“Test and treat”</b> | 1.03 (0.61; 1.74)                 |
| 0.58 (0.37; 0.91)       | 0.83 (0.43; 1.59)       | 0.85 (0.54; 1.34)       | <b>Empirical acid suppression</b> |

Relative risk with 95% confidence intervals in parentheses. Comparisons, column versus row, should be read from left to right, and are ordered relative to their overall effectiveness. The treatment in the top left position is ranked as best after the network meta-analysis of direct and indirect effects. Boxes highlighted in green indicate significant differences. Direct comparisons are provided above the strategy labels, and indirect comparisons are below.

**Supplementary Table 7. *Netsplit* Analysis of Inconsistency for Participant Dissatisfaction with Management.**

| Comparison                                      | k | Prop. | NMA    | Direct | Indirect | RoR    | z     | p-value |
|-------------------------------------------------|---|-------|--------|--------|----------|--------|-------|---------|
| "Test and scope" vs. "Test and treat"           | 1 | 0.77  | 0.9666 | 0.9308 | 1.0971   | 0.8484 | -0.21 | 0.8315  |
| "Test and scope" vs. Empirical acid suppression | 1 | 0.81  | 0.8256 | 1.0588 | 0.2934   | 3.6089 | 1.52  | 0.1290  |
| "Test and scope" vs. Prompt endoscopy           | 1 | 0.76  | 1.4338 | 1.1596 | 2.8467   | 0.4074 | -1.17 | 0.2420  |
| "Test and treat" vs. Empirical acid suppression | 2 | 0.74  | 0.8542 | 1.0346 | 0.4923   | 2.1016 | 1.41  | 0.1572  |
| "Test and treat" vs. Prompt endoscopy           | 4 | 0.88  | 1.4834 | 1.3415 | 3.1338   | 0.4281 | -1.44 | 0.1511  |
| Prompt endoscopy vs. Empirical acid suppression | 2 | 0.72  | 0.5758 | 0.5385 | 0.6845   | 0.7867 | -0.46 | 0.6431  |

**Legend**

Comparison: Treatment comparison  
k: Number of studies providing direct evidence  
Prop.: Direct evidence proportion  
NMA: Estimated treatment effect (RR) in network meta-analysis  
Direct: Estimated treatment effect (RR) derived from direct evidence  
Indirect: Estimated treatment effect (RR) derived from indirect evidence  
RoR: Ratio of Ratios (direct versus indirect)  
z: z-value of test for disagreement (direct versus indirect)  
p-value: p-value of test for disagreement (direct versus indirect)



# SUPPLEMENTARY FIGURES

## Supplementary Figure 1. Pairwise Meta-analysis for Likelihood of Remaining Symptomatic According to Intention-to-treat Analysis at the Last Point of Follow-up.

a. "Test and treat" vs. "Test and scope"

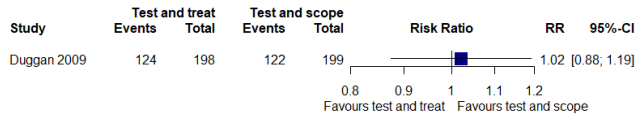

b. "Test and treat" vs. Prompt endoscopy

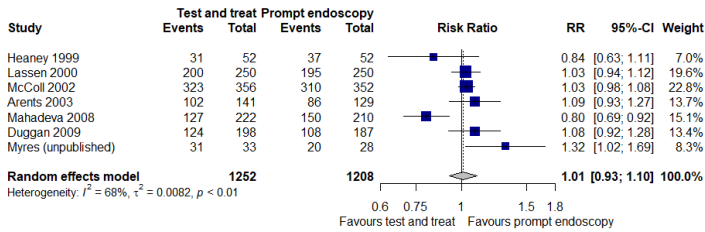

c. "Test and treat" vs. Empirical acid suppression

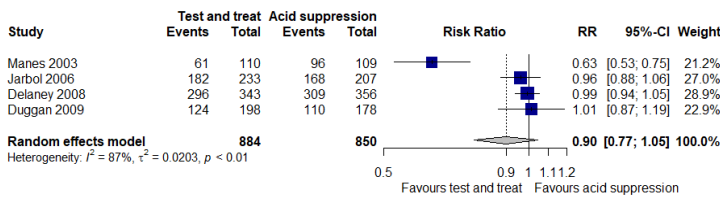

d. "Test and scope" vs. Prompt endoscopy

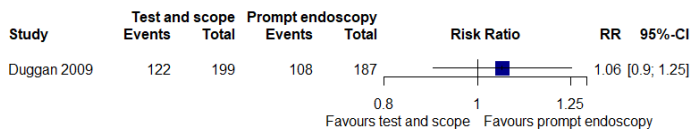

e. "Test and scope" vs. Empirical acid suppression

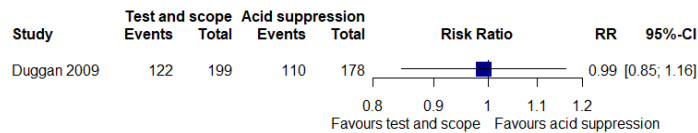

f. "Test and scope" vs. Symptom-based management

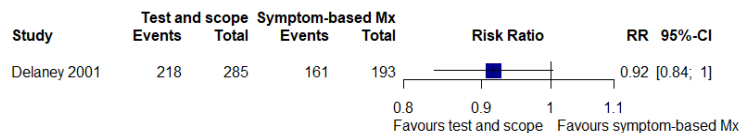

g. Prompt endoscopy vs. Empirical acid suppression

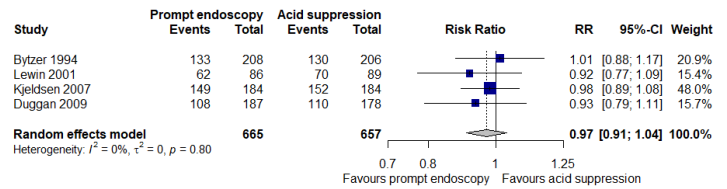

h. Prompt endoscopy vs. Symptom-based management

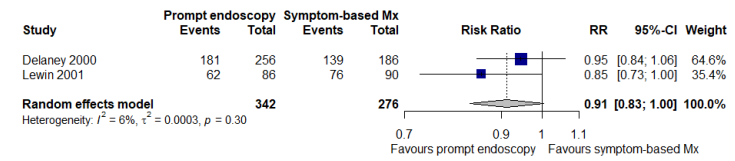

i. Empirical acid suppression vs. Symptom-based

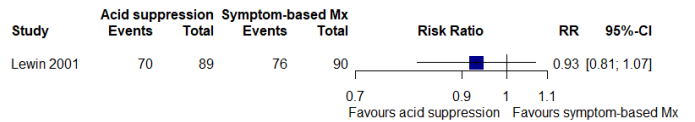

Note: there were no studies making direct comparisons between "test and treat" vs. symptom-based management.

## Supplementary Figure 2. Pairwise Meta-analysis for Likelihood of Receiving Endoscopy.

a. “Test and scope” vs. Prompt endoscopy

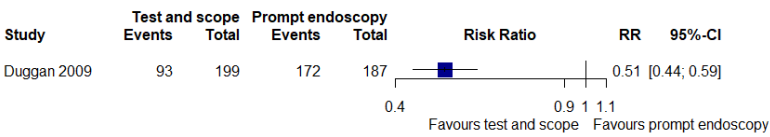

b. “Test and treat” vs. Empirical acid suppression

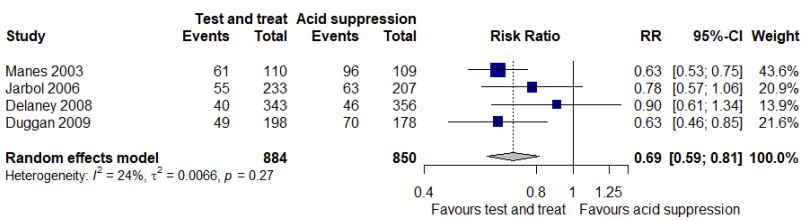

c. “Test and treat” vs. Prompt endoscopy

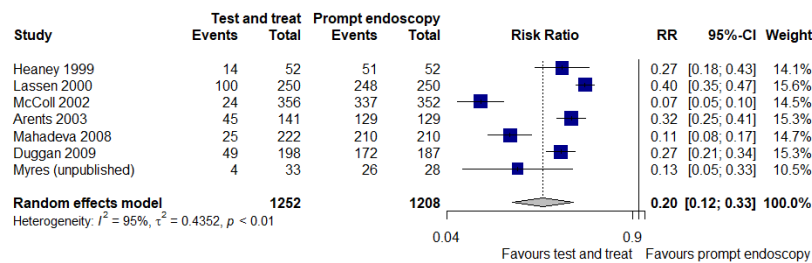

d. “Test and treat” vs. “Test and scope”

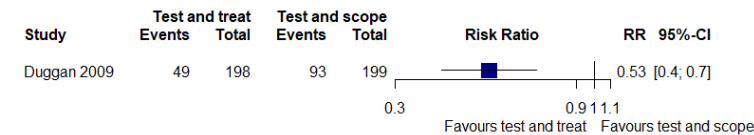

e. “Test and scope” vs. Empirical acid suppression

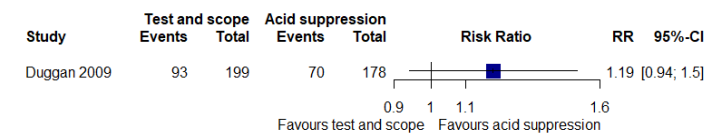

f. “Test and scope” vs. Symptom-based management

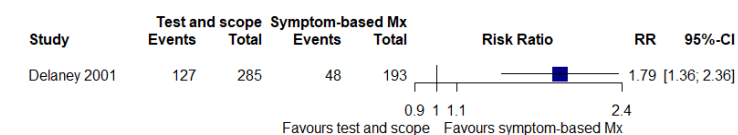

g. Prompt endoscopy vs. Empirical acid suppression

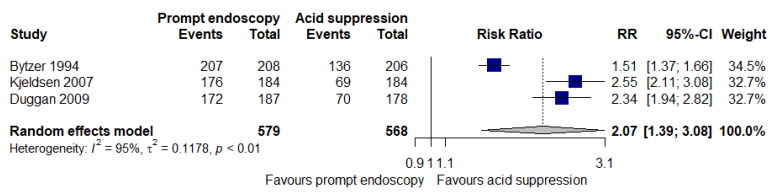

h. Prompt endoscopy vs. Symptom-based management

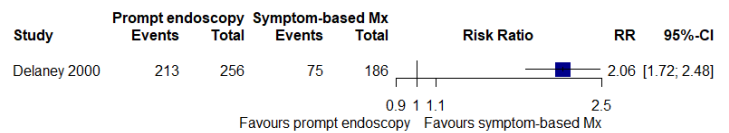

Note: there were no studies making direct comparisons between: “test and treat” vs. symptom-based management, or empirical acid suppression vs. symptom-based management.

## Supplementary Figure 3. Pairwise Meta-analysis for Participant Dissatisfaction with Management.

b. Prompt endoscopy vs. Empirical acid suppression

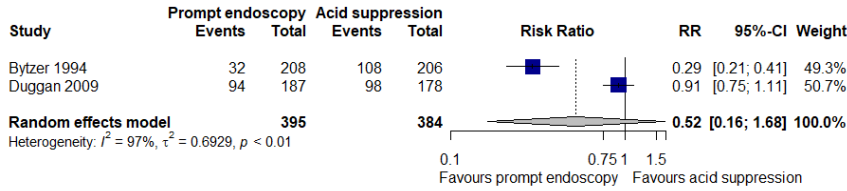

a. "Test and treat" vs. "Test and scope"

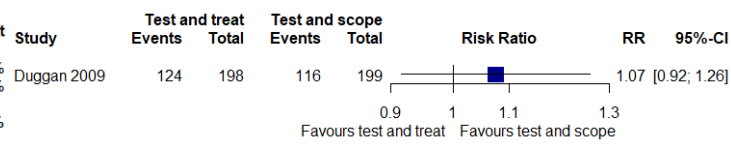

c. "Test and scope" vs. Empirical acid suppression

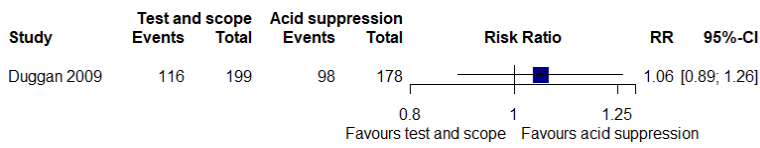

d. "Test and scope" vs. Prompt endoscopy

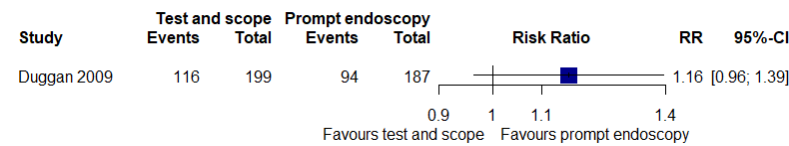

e. "Test and treat" vs. Empirical acid suppression

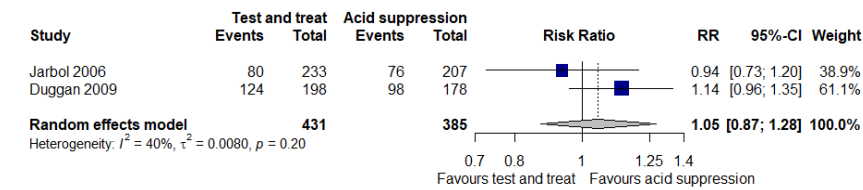

f. "Test and treat" vs. Prompt endoscopy

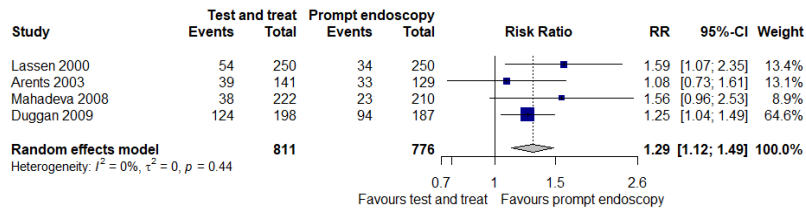

Note: there were no studies making direct comparisons between: "test and treat" vs. symptom-based management; "test and scope vs. symptom-based management; prompt endoscopy vs. symptom-based management; or empirical acid suppression vs. symptom-based management.

**Supplementary Figure 4. Flow Diagram of Assessment of Studies Identified in the Systematic Review.**

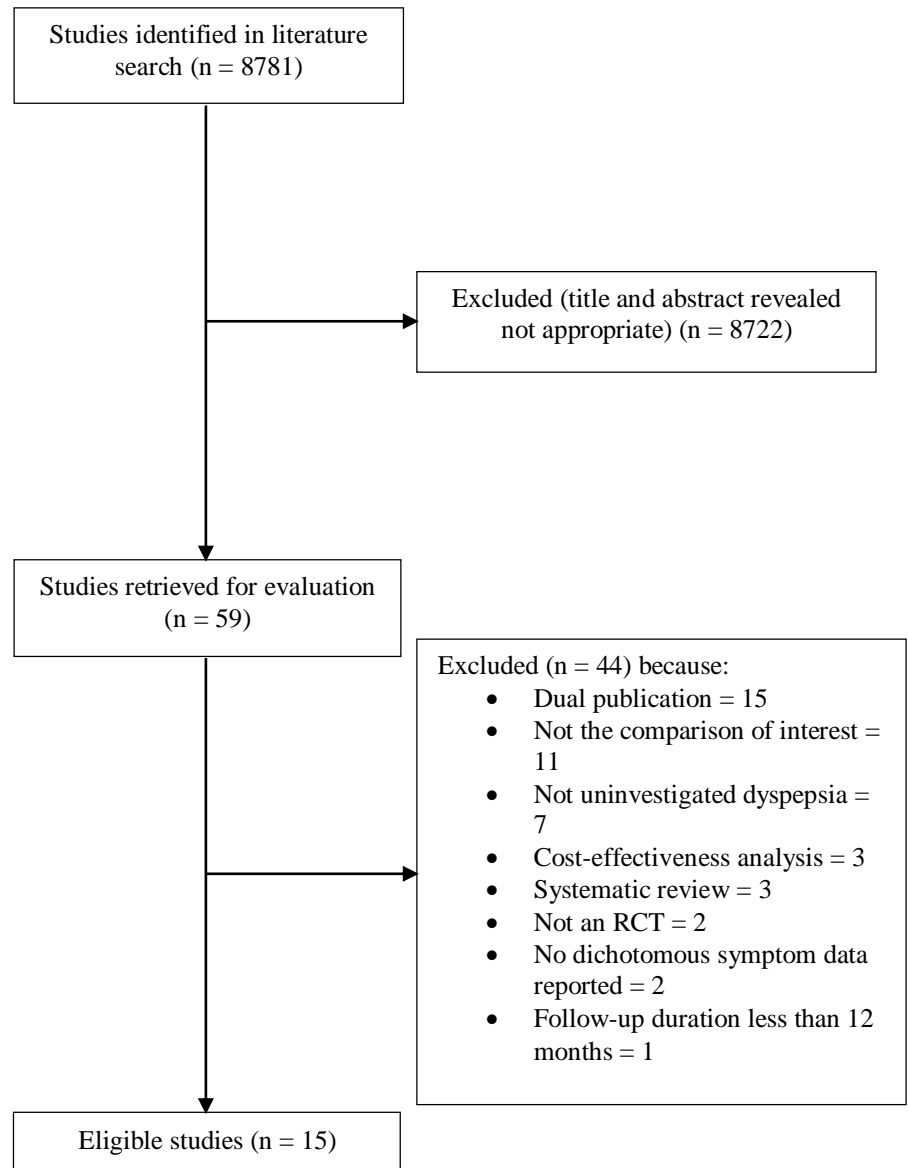

**Supplementary Figure 5. Funnel Plot for Likelihood of Remaining Symptomatic  
According to Intention-to-treat Analysis at the Last Point of Follow-up.**

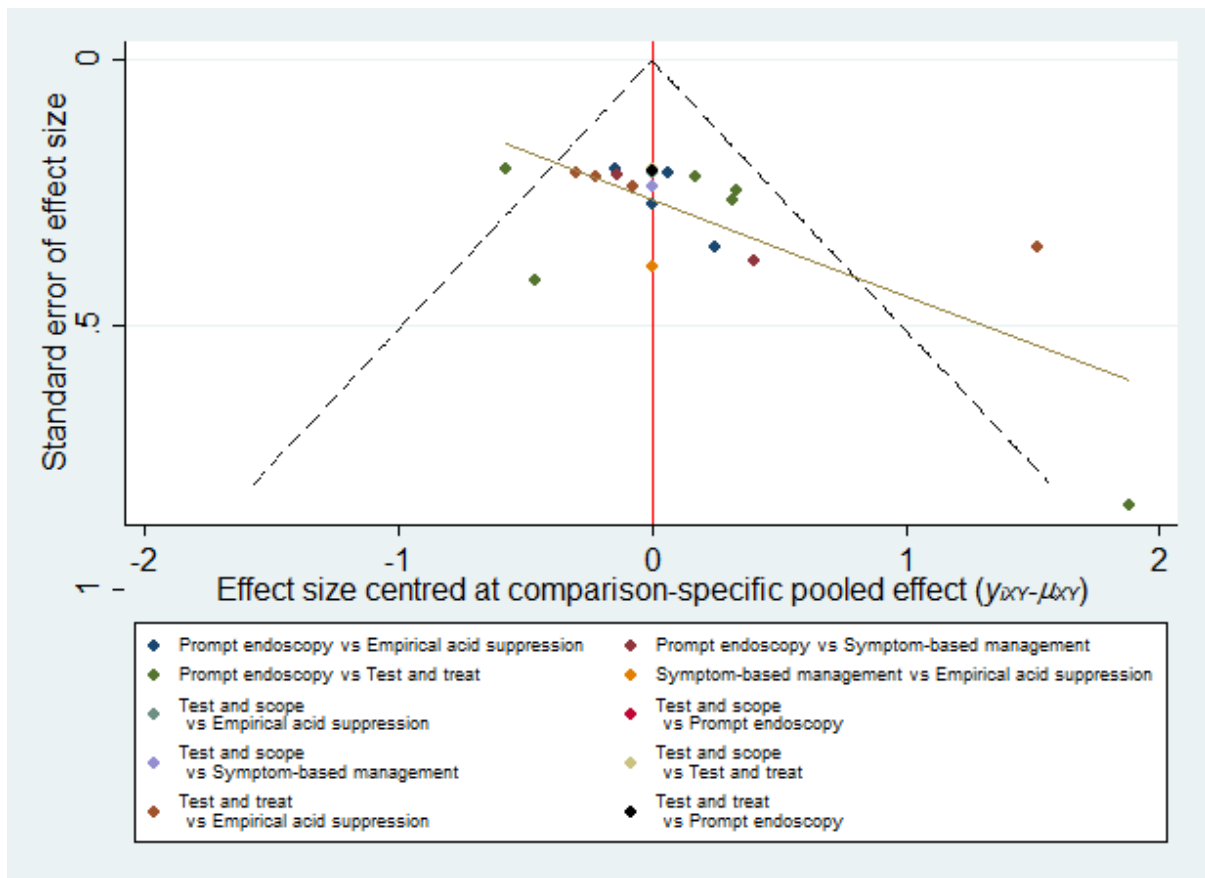

Note: The horizontal axis represents the difference between the comparison-specific and study-specific effect sizes.

**Supplementary Figure 6. Network Heat Plot for Likelihood of Remaining Symptomatic According to Intention-to-treat Analysis at the Last Point of Follow-up.**

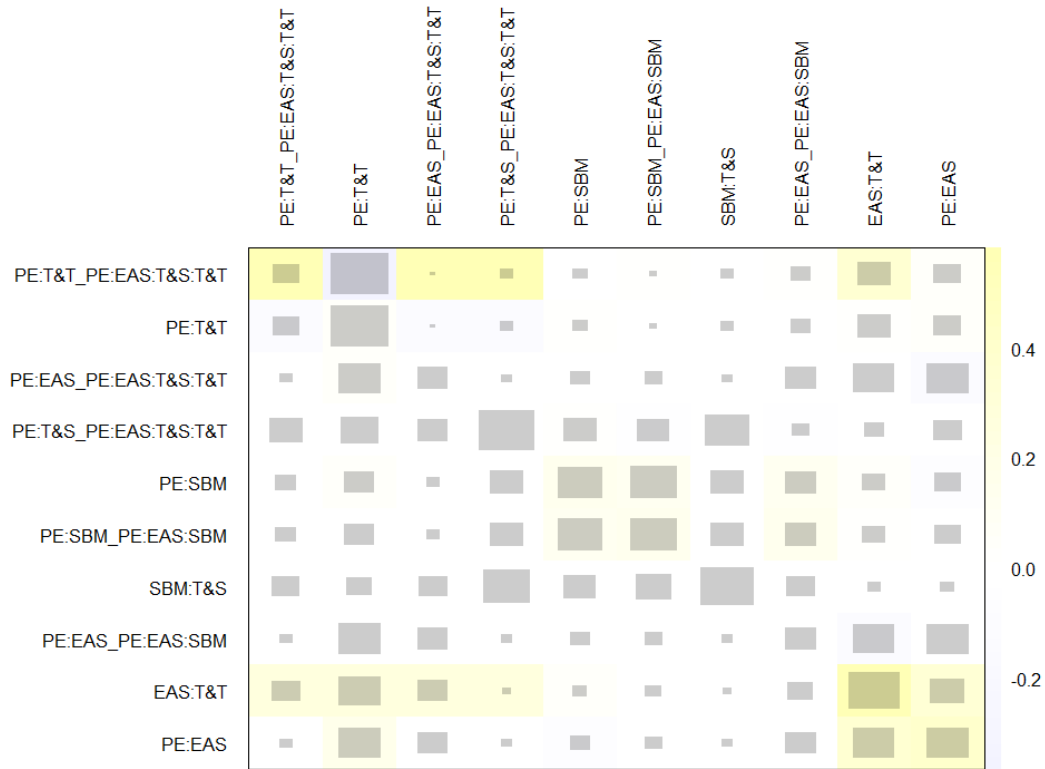

| Legend                     |              |
|----------------------------|--------------|
| Intervention               | Abbreviation |
| Prompt endoscopy           | PE           |
| Empirical acid suppression | EAS          |
| “Test and treat”           | T&T          |
| Symptom-based management   | SBM          |
| “Test and scope”           | T&S          |

**Supplementary Figure 7. Network Plot for Likelihood of Remaining Symptomatic According to Per Protocol Analysis at the Last Point of Follow-up.**

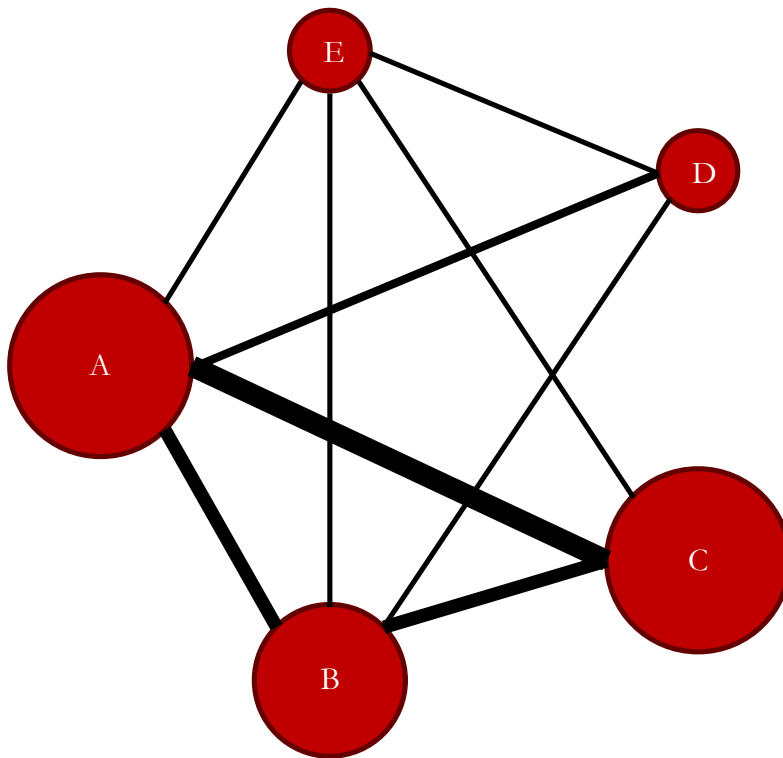

| <b>Legend</b>              |                     |                             |                               |
|----------------------------|---------------------|-----------------------------|-------------------------------|
| <b>Intervention</b>        | <b>Abbreviation</b> | <b>Number of trial arms</b> | <b>Number of participants</b> |
| Prompt endoscopy           | A                   | 11                          | 1667                          |
| Empirical acid suppression | B                   | 7                           | 1150                          |
| “Test and treat”           | C                   | 10                          | 1689                          |
| Symptom-based management   | D                   | 3                           | 322                           |
| “Test and scope”           | E                   | 2                           | 326                           |

**Supplementary Figure 8. Funnel Plot for Likelihood of Remaining Symptomatic  
According to Per Protocol Analysis at the Last Point of Follow-up.**

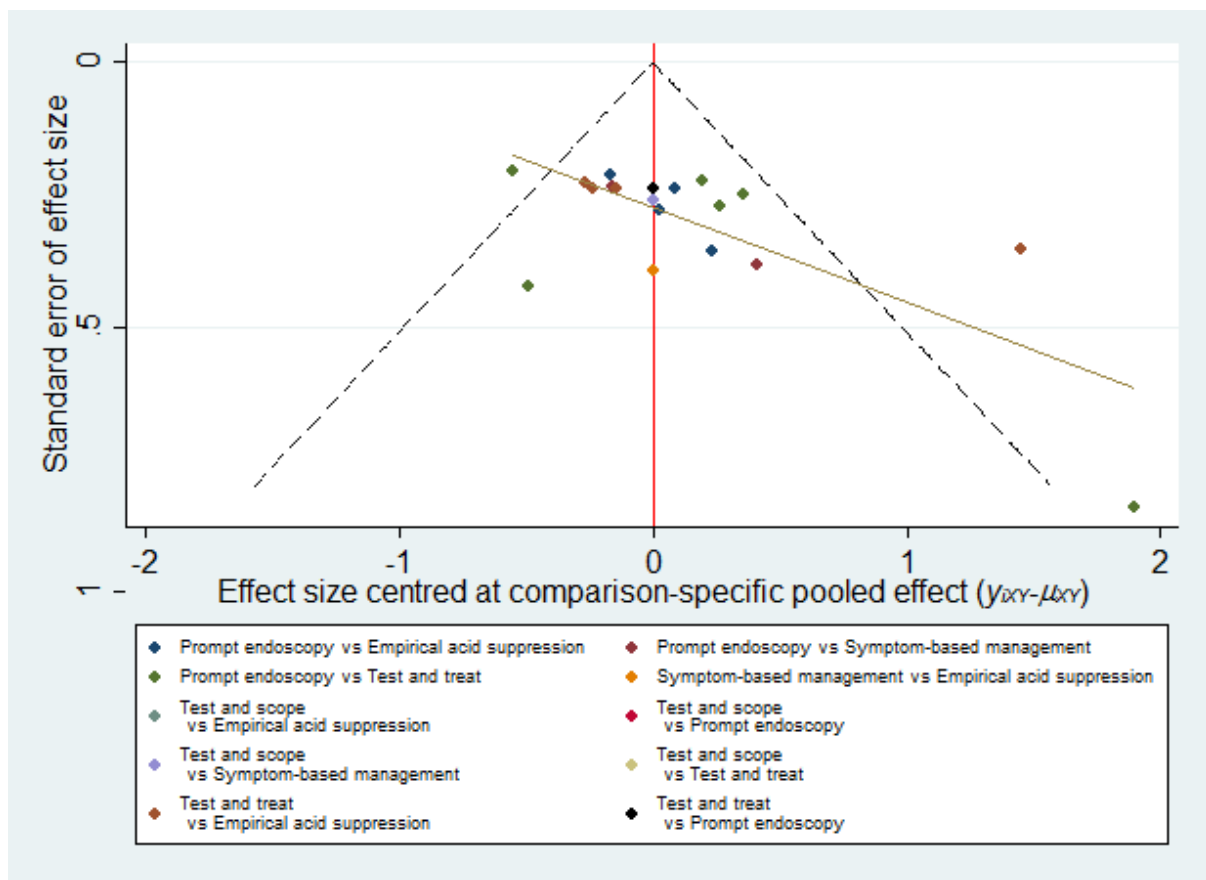

Note: The horizontal axis represents the difference between the comparison-specific and study-specific effect sizes.



**Supplementary Figure 9. Network Heat Plot for Likelihood of Remaining Symptomatic According to Per Protocol Analysis at the Last Point of Follow-up.**

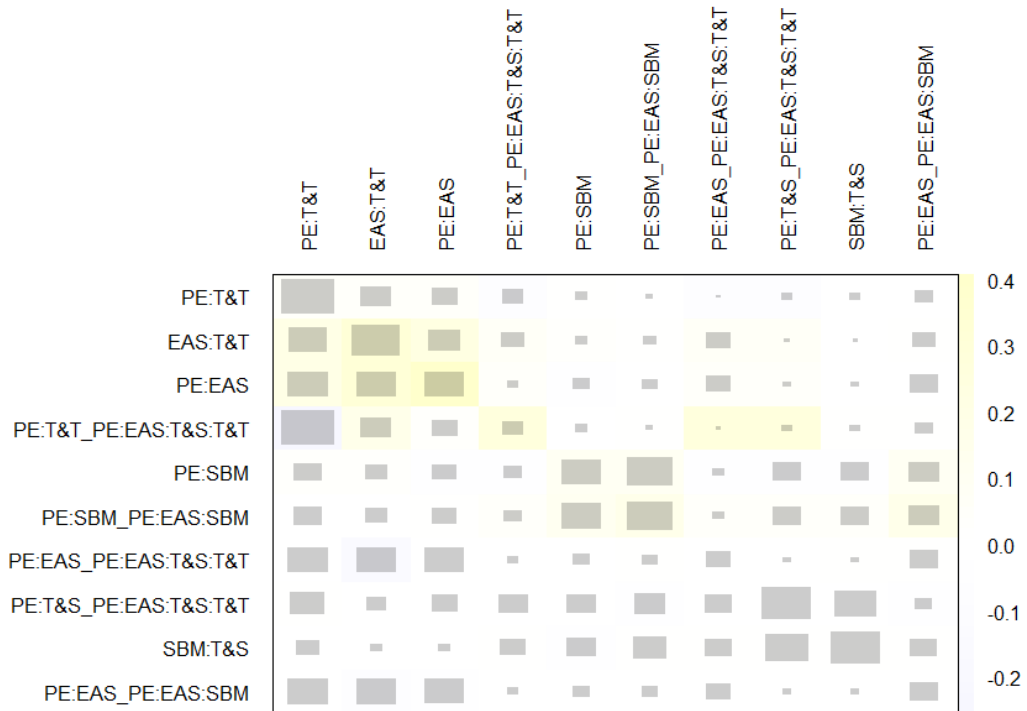

| Legend                     |              |
|----------------------------|--------------|
| Intervention               | Abbreviation |
| Prompt endoscopy           | PE           |
| Empirical acid suppression | EAS          |
| “Test and treat”           | T&T          |
| Symptom-based management   | SBM          |
| “Test and scope”           | T&S          |

**Supplementary Figure 10. Forest Plot for Likelihood of Remaining Symptomatic According to Per Protocol Analysis at the Last Point of Follow-up.**

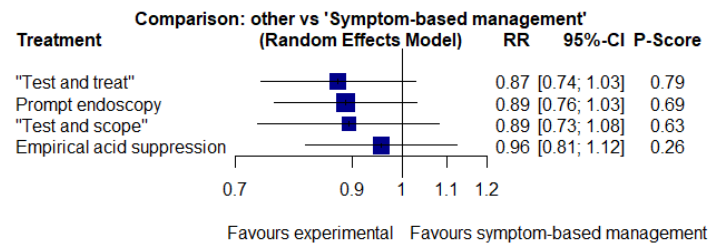

Note: The P-score is the probability of each treatment being ranked as best in the network analysis. A higher score equates to a greater probability of being ranked first.

Supplementary Figure 11. Network Plot for Likelihood of Receiving Endoscopy.

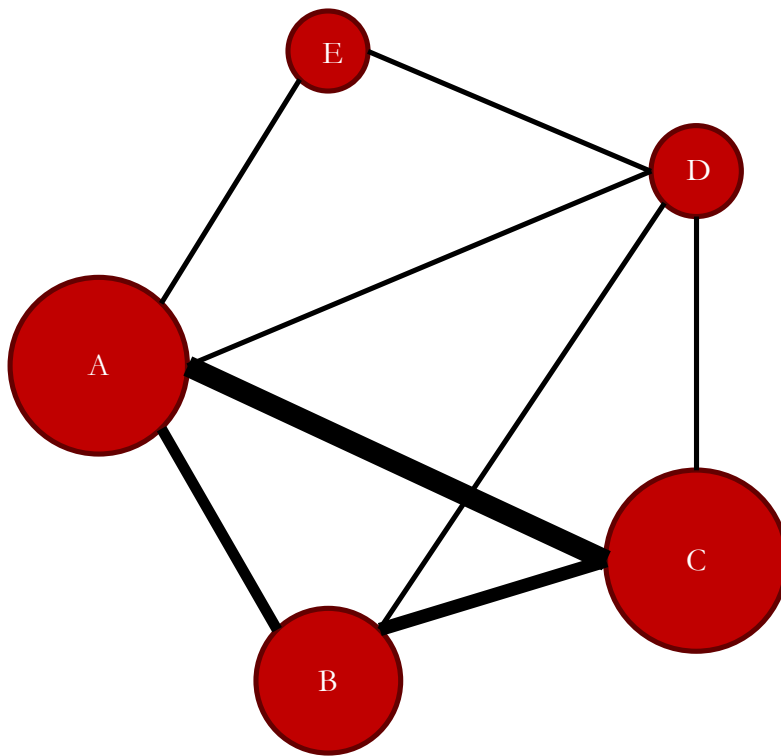

| Legend                     |              |                      |                        |
|----------------------------|--------------|----------------------|------------------------|
| Intervention               | Abbreviation | Number of trial arms | Number of participants |
| Prompt endoscopy           | A            | 10                   | 1856                   |
| Empirical acid suppression | B            | 6                    | 379                    |
| “Test and treat”           | C            | 10                   | 1938                   |
| “Test and scope”           | D            | 2                    | 484                    |
| Symptom-based management   | E            | 2                    | 1240                   |

Supplementary Figure 12. Funnel Plot for Likelihood of Receiving Endoscopy.

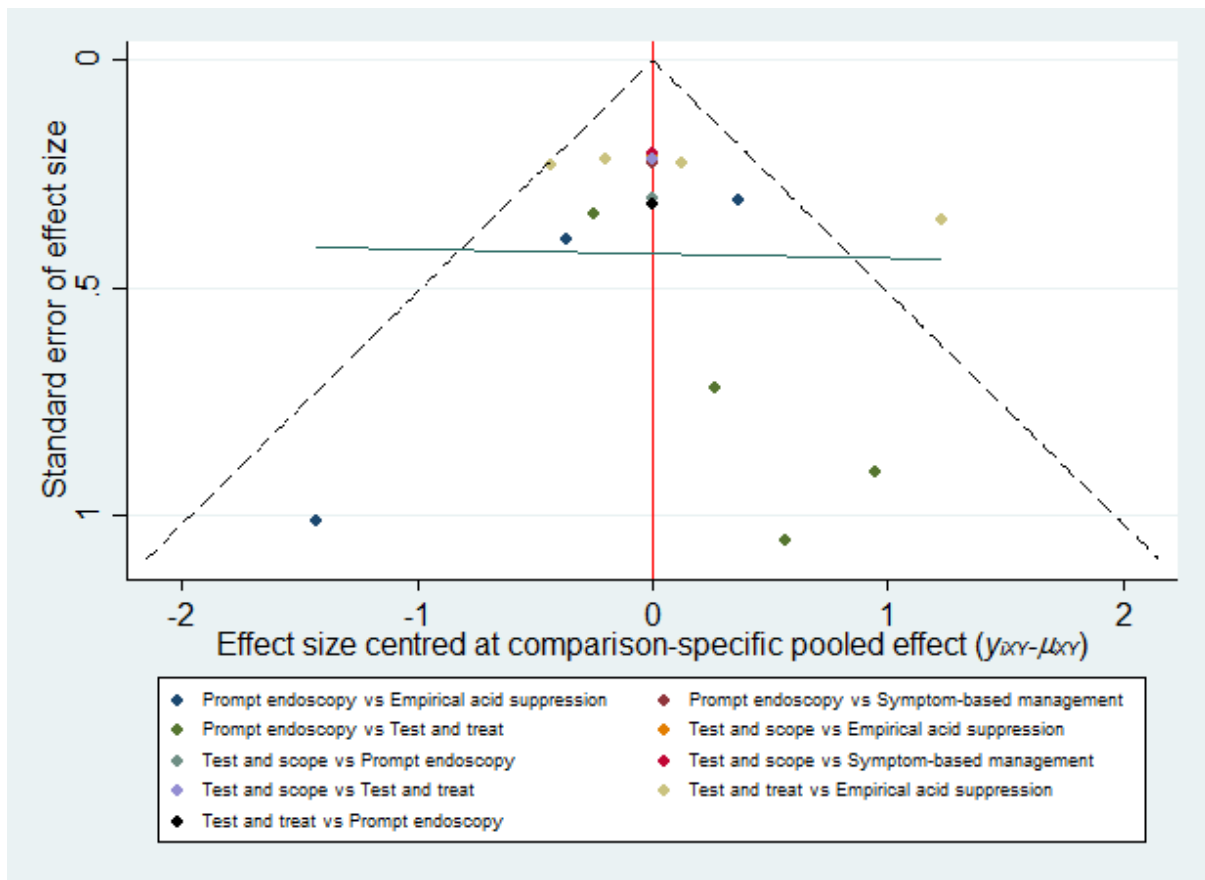

Note: The horizontal axis represents the difference between the comparison-specific and study-specific effect sizes.

**Supplementary Figure 13. Network Heat Plot for Likelihood of Receiving Endoscopy.**

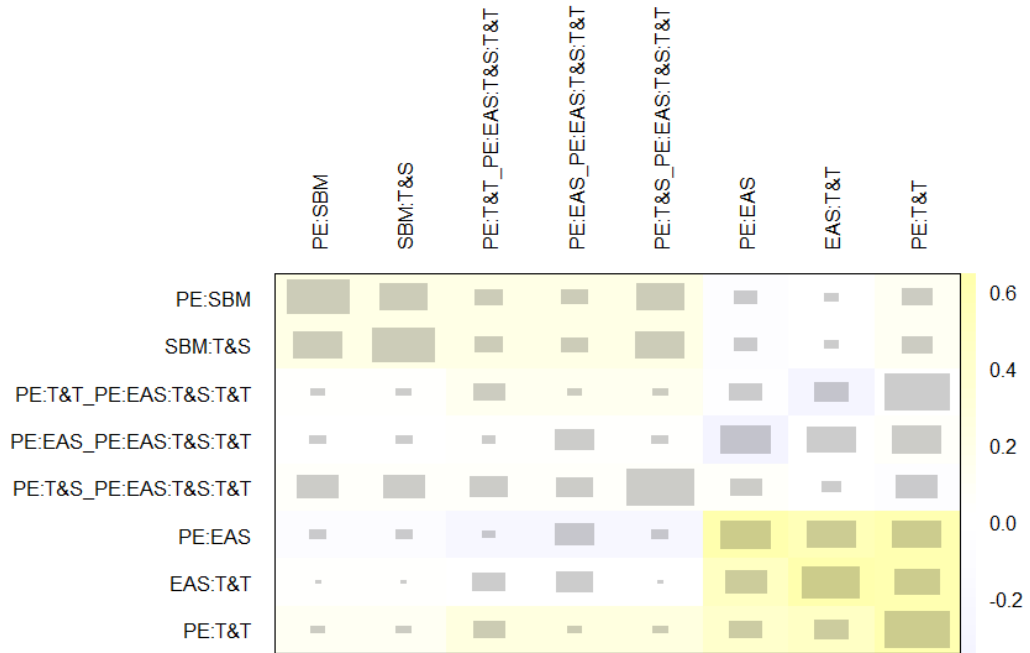

| Legend                     |              |
|----------------------------|--------------|
| Drug                       | Abbreviation |
| Prompt endoscopy           | PE           |
| Empirical acid suppression | EAS          |
| “Test and treat”           | T&T          |
| Symptom-based management   | SBM          |
| “Test and scope”           | T&S          |

**Supplementary Figure 14. Network Plot for Participant Dissatisfaction with Management.**

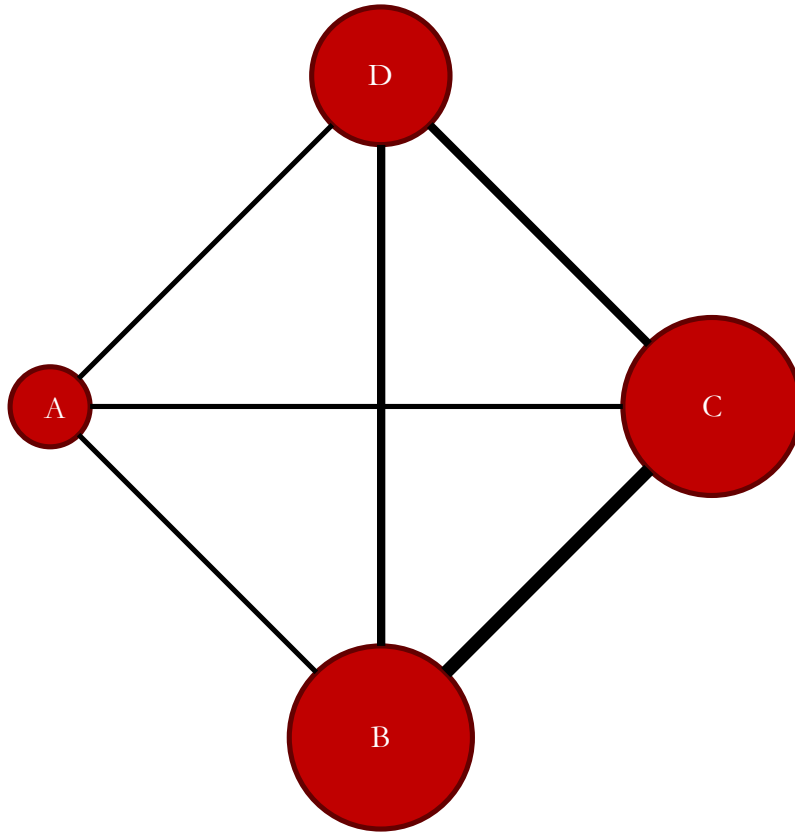

| <b>Legend</b>              |                     |                             |                               |
|----------------------------|---------------------|-----------------------------|-------------------------------|
| <b>Intervention</b>        | <b>Abbreviation</b> | <b>Number of trial arms</b> | <b>Number of participants</b> |
| "Test and scope"           | A                   | 1                           | 199                           |
| "Test and treat"           | B                   | 5                           | 1044                          |
| Prompt endoscopy           | C                   | 5                           | 984                           |
| Empirical acid suppression | D                   | 3                           | 591                           |

### Supplementary Figure 15. Forest Plot for Participant Dissatisfaction with Management.

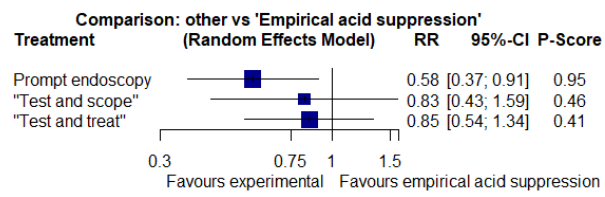

Note: The P-score is the probability of each treatment being ranked as best in the network analysis. A higher score equates to a greater probability of being ranked first.

**Supplementary Figure 16. Network Heat Plot for Participant Dissatisfaction with Management.**

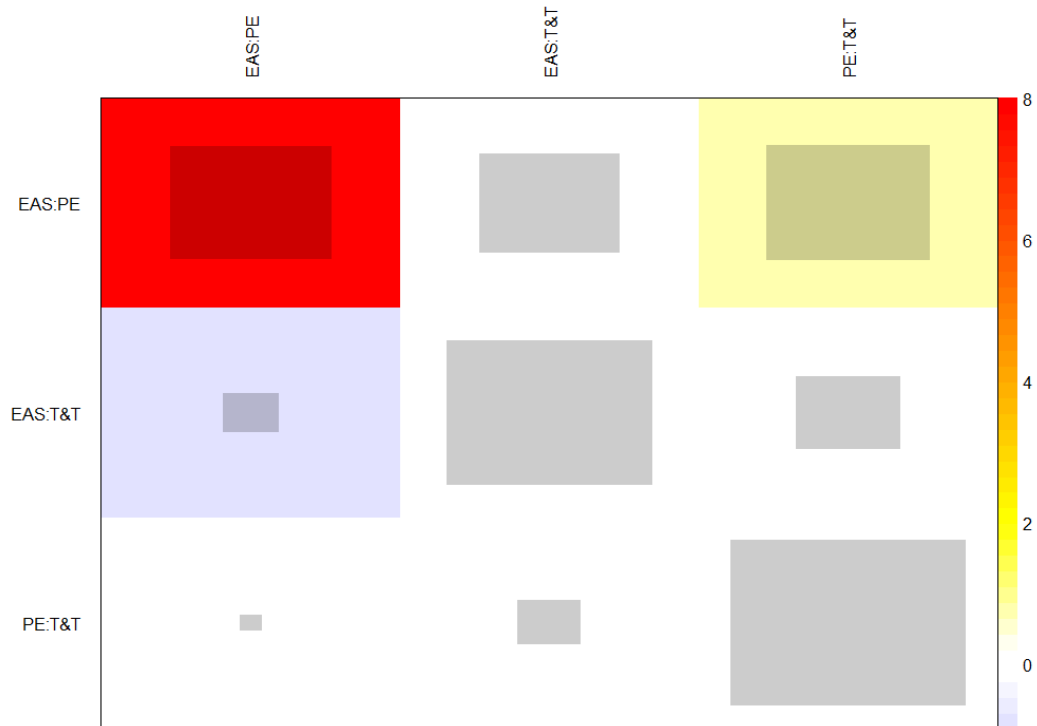

| Legend                     |              |
|----------------------------|--------------|
| Intervention               | Abbreviation |
| Prompt endoscopy           | PE           |
| Empirical acid suppression | EAS          |
| “Test and treat”           | T&T          |
